# Supplementary material for: Wyner-Ziv video coding for wireless lightweight multimedia applications
Source: Springer Nature journal article supplement (doi:10.1186/1687-1499-2012-106), 2012-03-14
Supplement: 13638_2011_327_MOESM3_ESM.pdf [file 13638_2011_327_MOESM3_ESM.pdf]

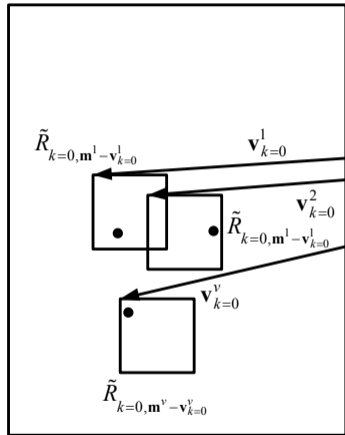

Preprocessed reference frame 0:  $\tilde{R}_{k=0}$

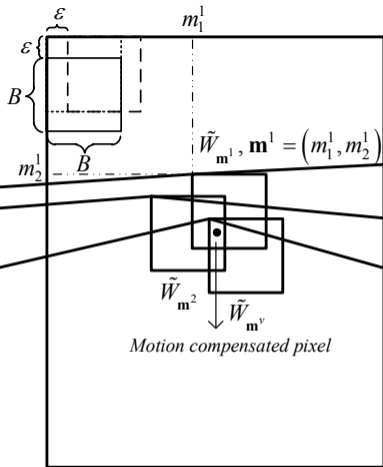

Decoded and upscaled hash frame:  $\tilde{W}$

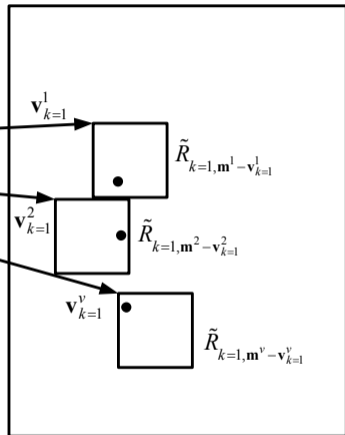

Preprocessed reference frame 1:  $\tilde{R}_{k=1}$
