# Supplementary material for: Wyner-Ziv video coding for wireless lightweight multimedia applications
Source: Springer Nature journal article supplement (doi:10.1186/1687-1499-2012-106), 2012-03-14
Supplement: 13638_2011_327_MOESM7_ESM.pdf [file 13638_2011_327_MOESM7_ESM.pdf]

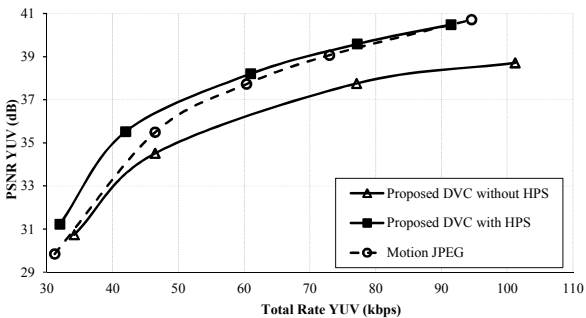

(a)

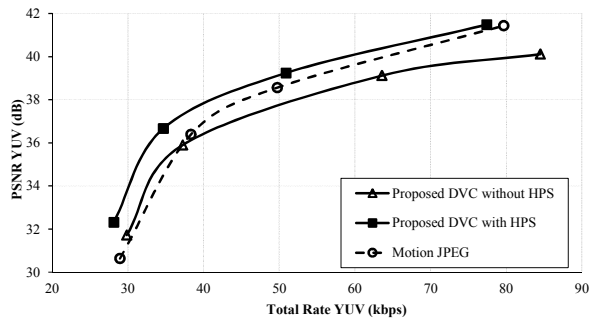

(b)

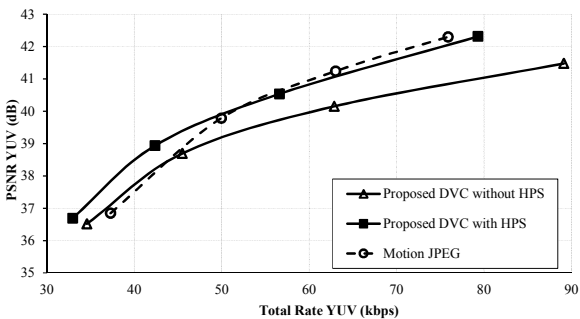

(c)

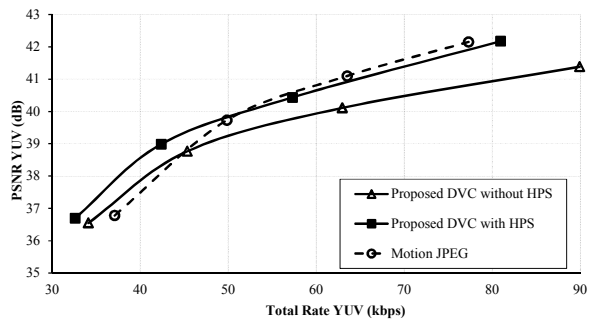

(d)
